# Supplementary material for: Population-Based Data Reveal Factors Associated with Organised and Non-Organised Colorectal Cancer Screening: An Important Step towards Improving Coverage
Source: MDPI journal article supplement (doi:10.3390/ijerph18168373), 2021-08-07

## **Supplemental material for**

### **Population-based data reveal factors associated with organised and non-organised colorectal cancer screening: an important step towards improving coverage**

#### **Supplementary figure**

**Supplementary Figure S1** Causal directed acyclic graphs (DAGs) constructed to identify covariates for adjustment in multivariable analyses. After covariate adjustment, no causal paths (indicated by purple lines) are present.

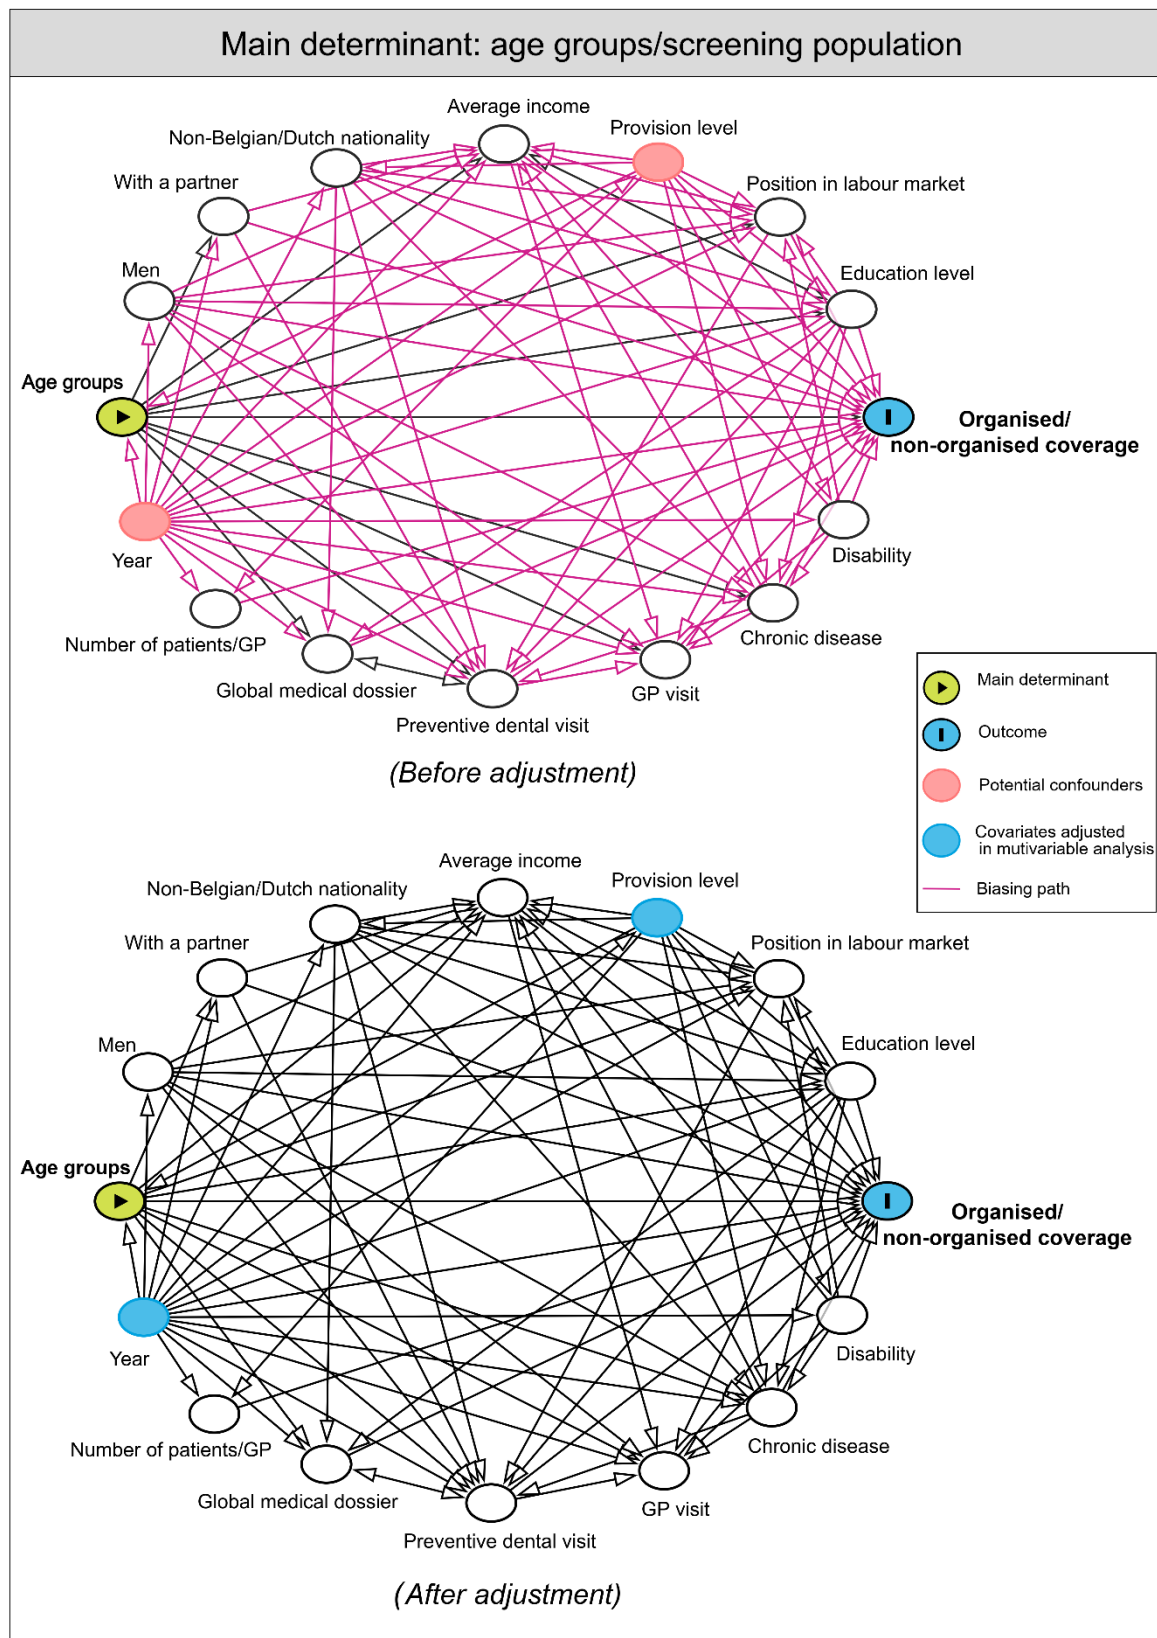

**Supplementary Figure S1** Causal directed acyclic graphs (DAGs) constructed to identify covariates for adjustment in multivariable analyses. After covariate adjustment, no causal paths (indicated by purple lines) are present.

Supplementary Figure S1 Continued.

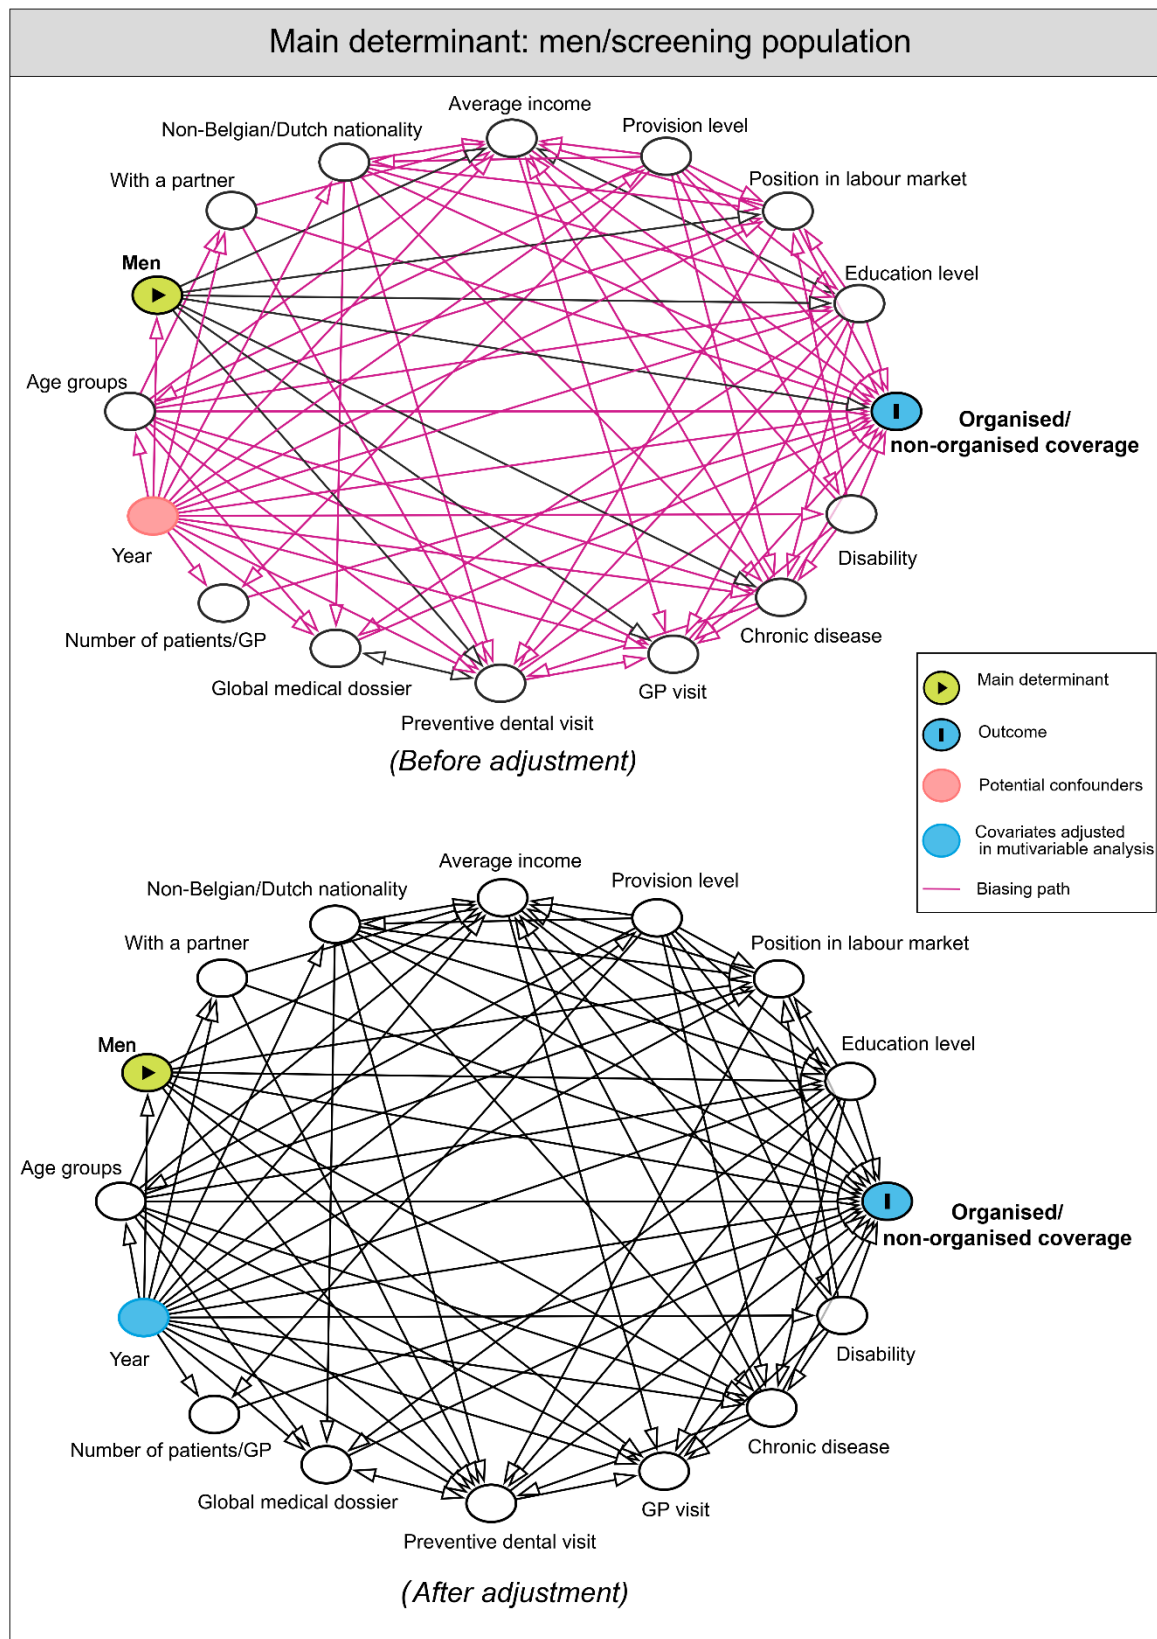

Supplementary Figure S1 Continued.

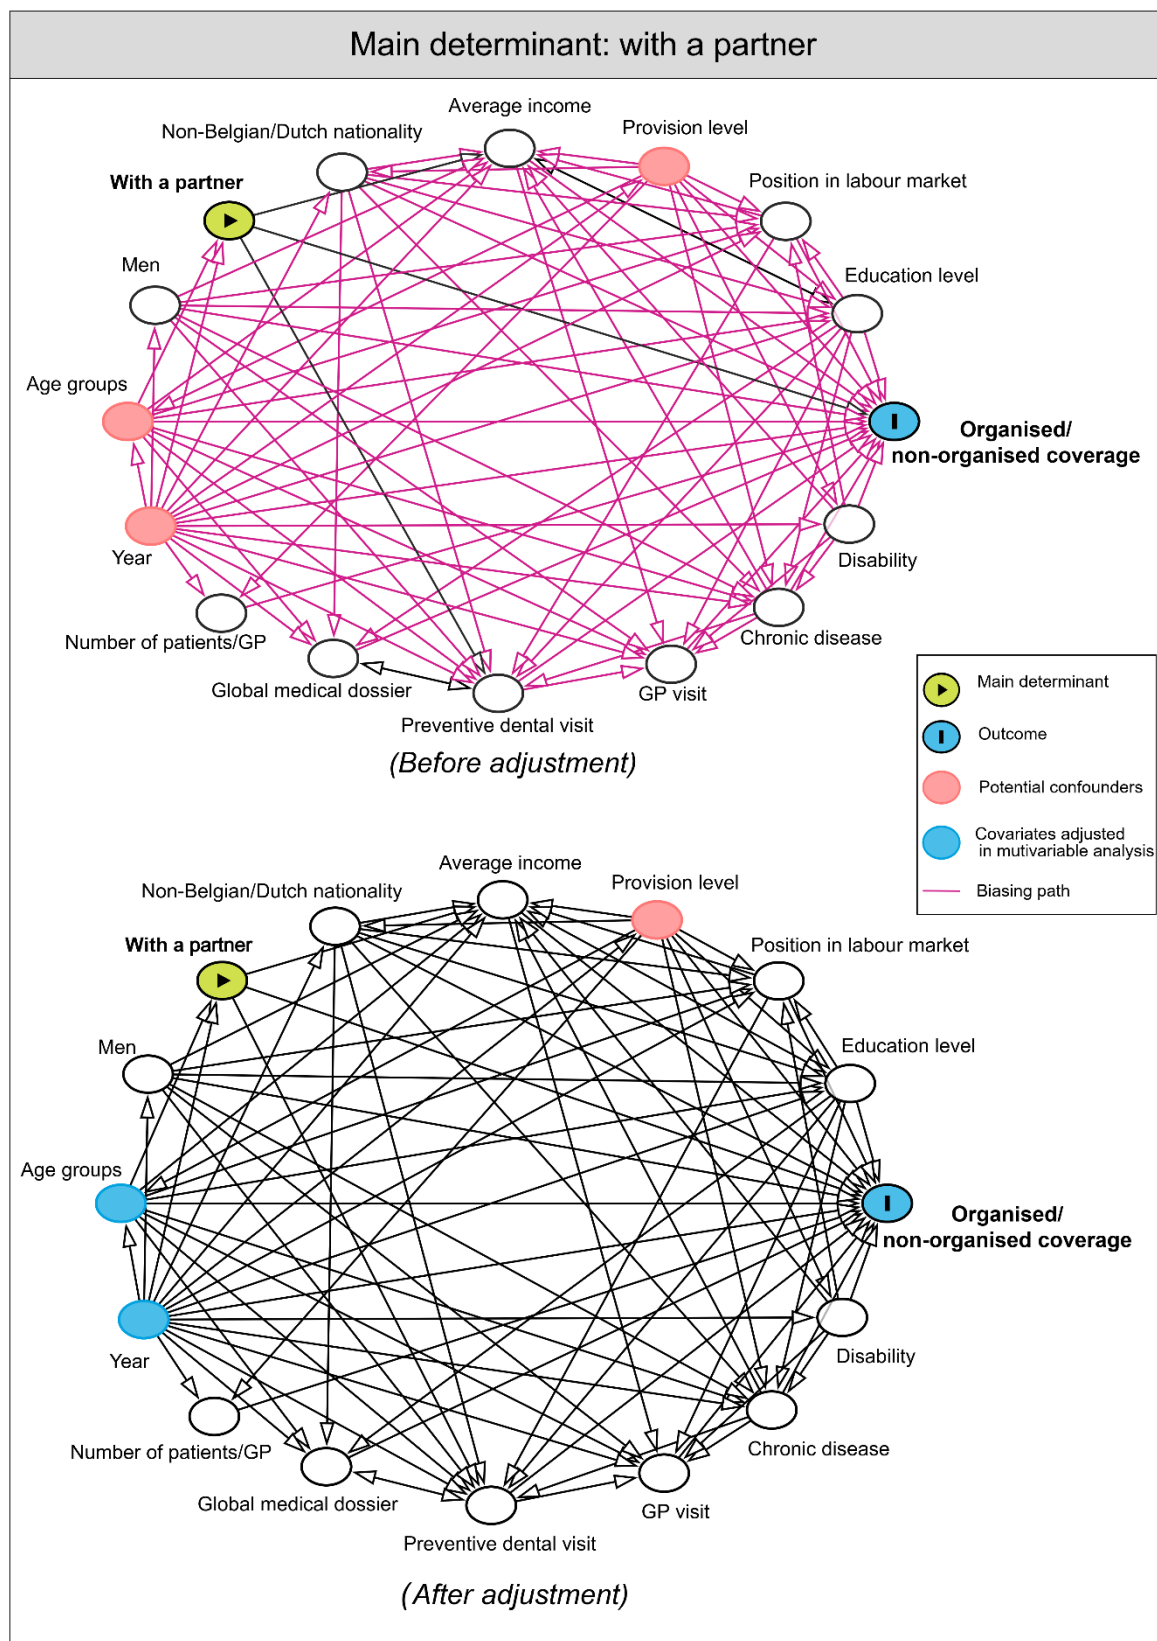

Supplementary Figure S1 Continued.

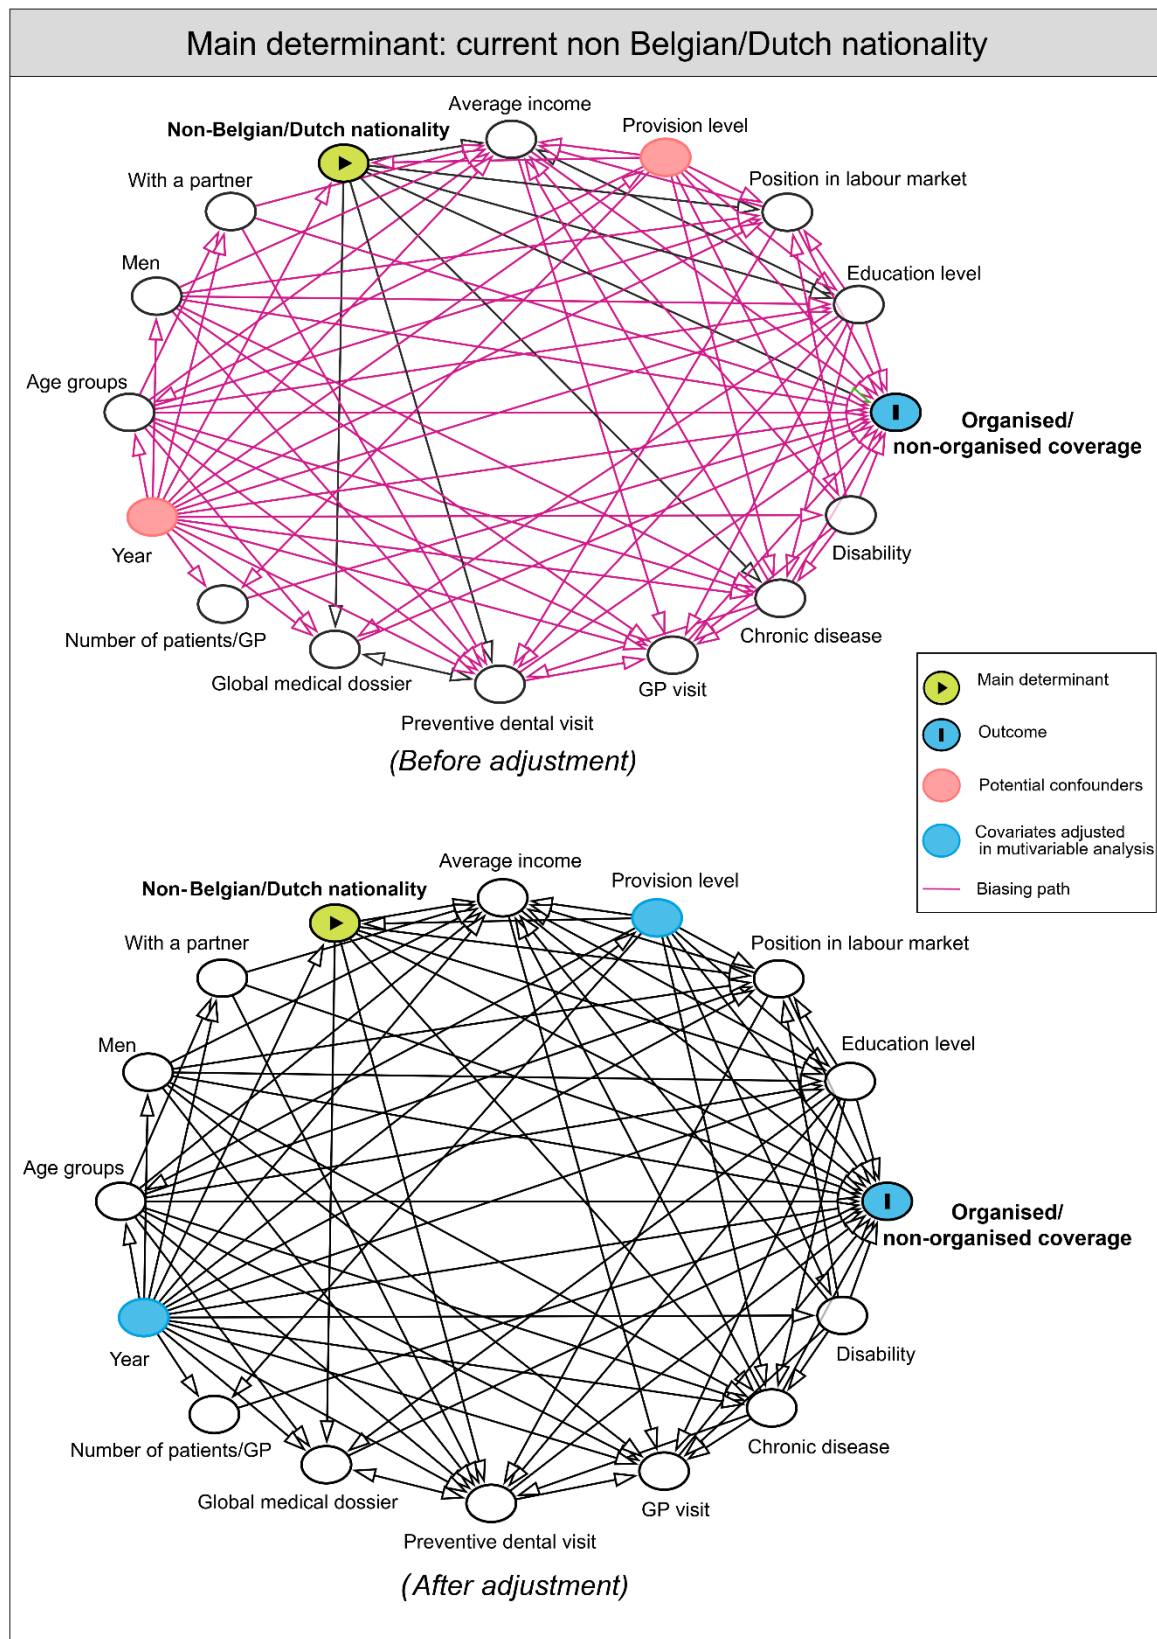



Supplementary Figure S1 Continued.

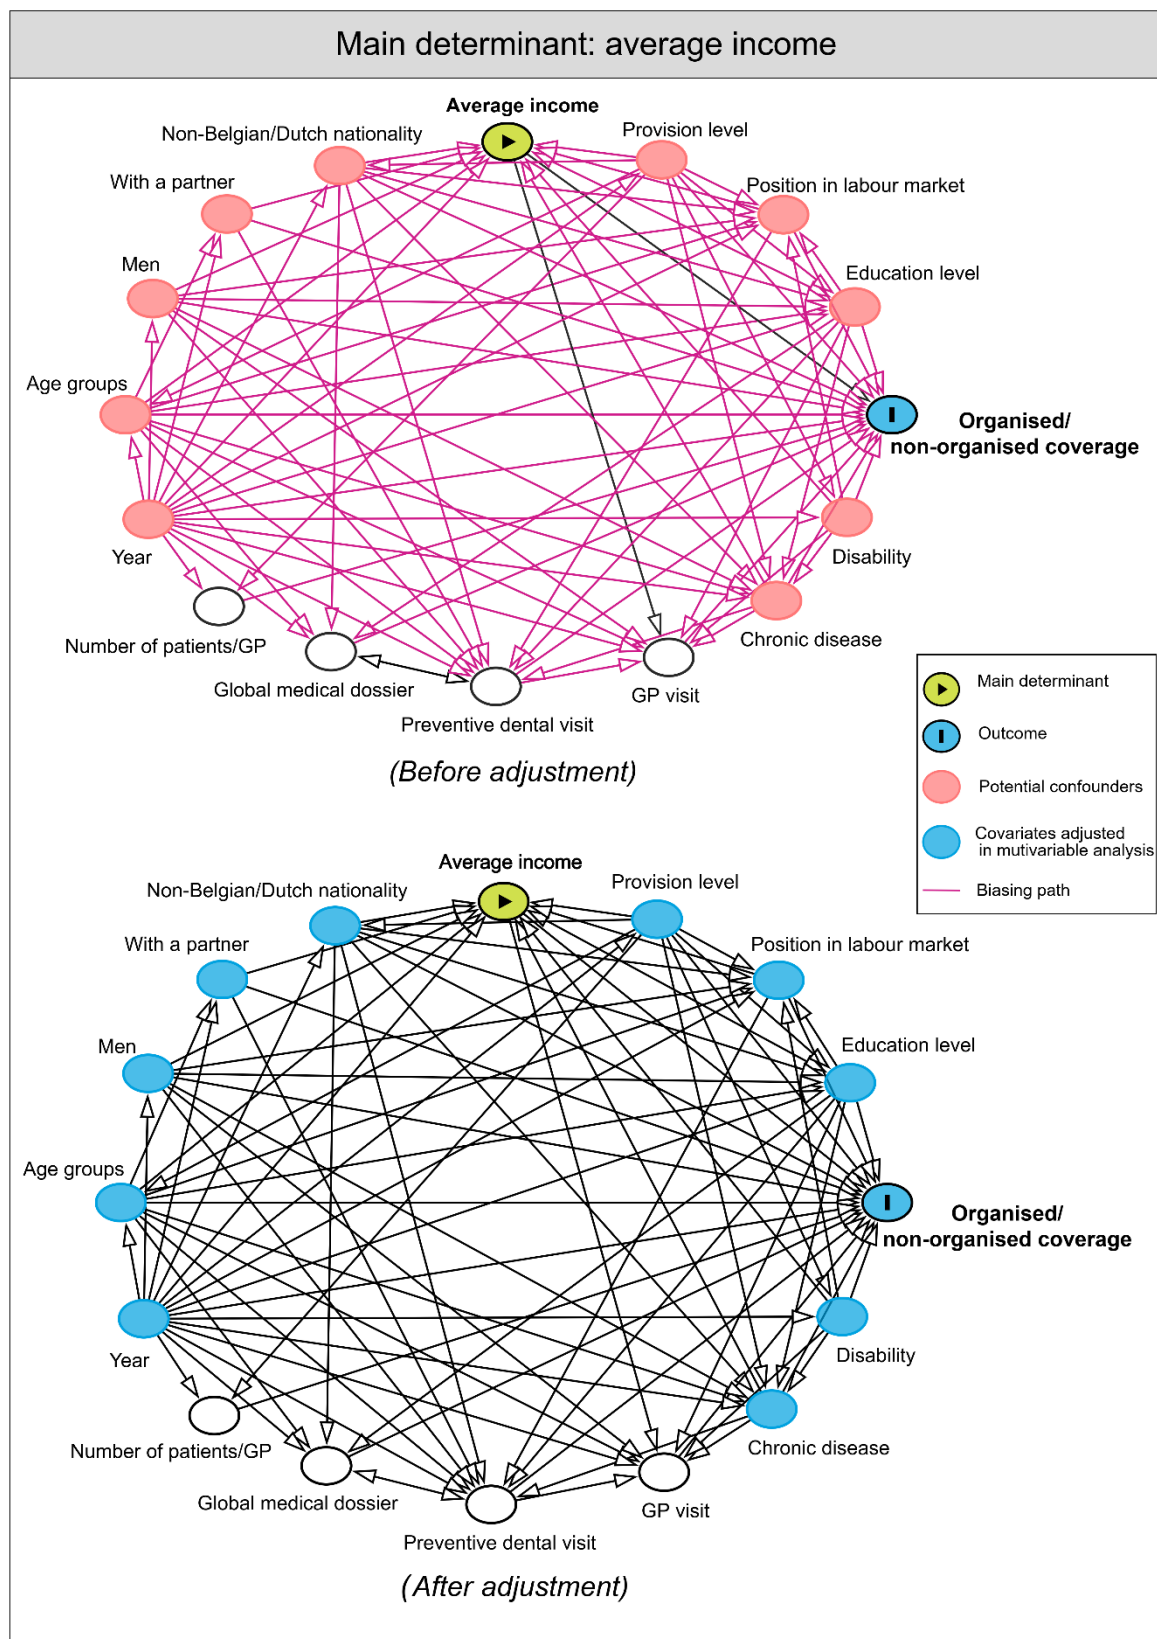

Supplementary Figure S1 Continued.

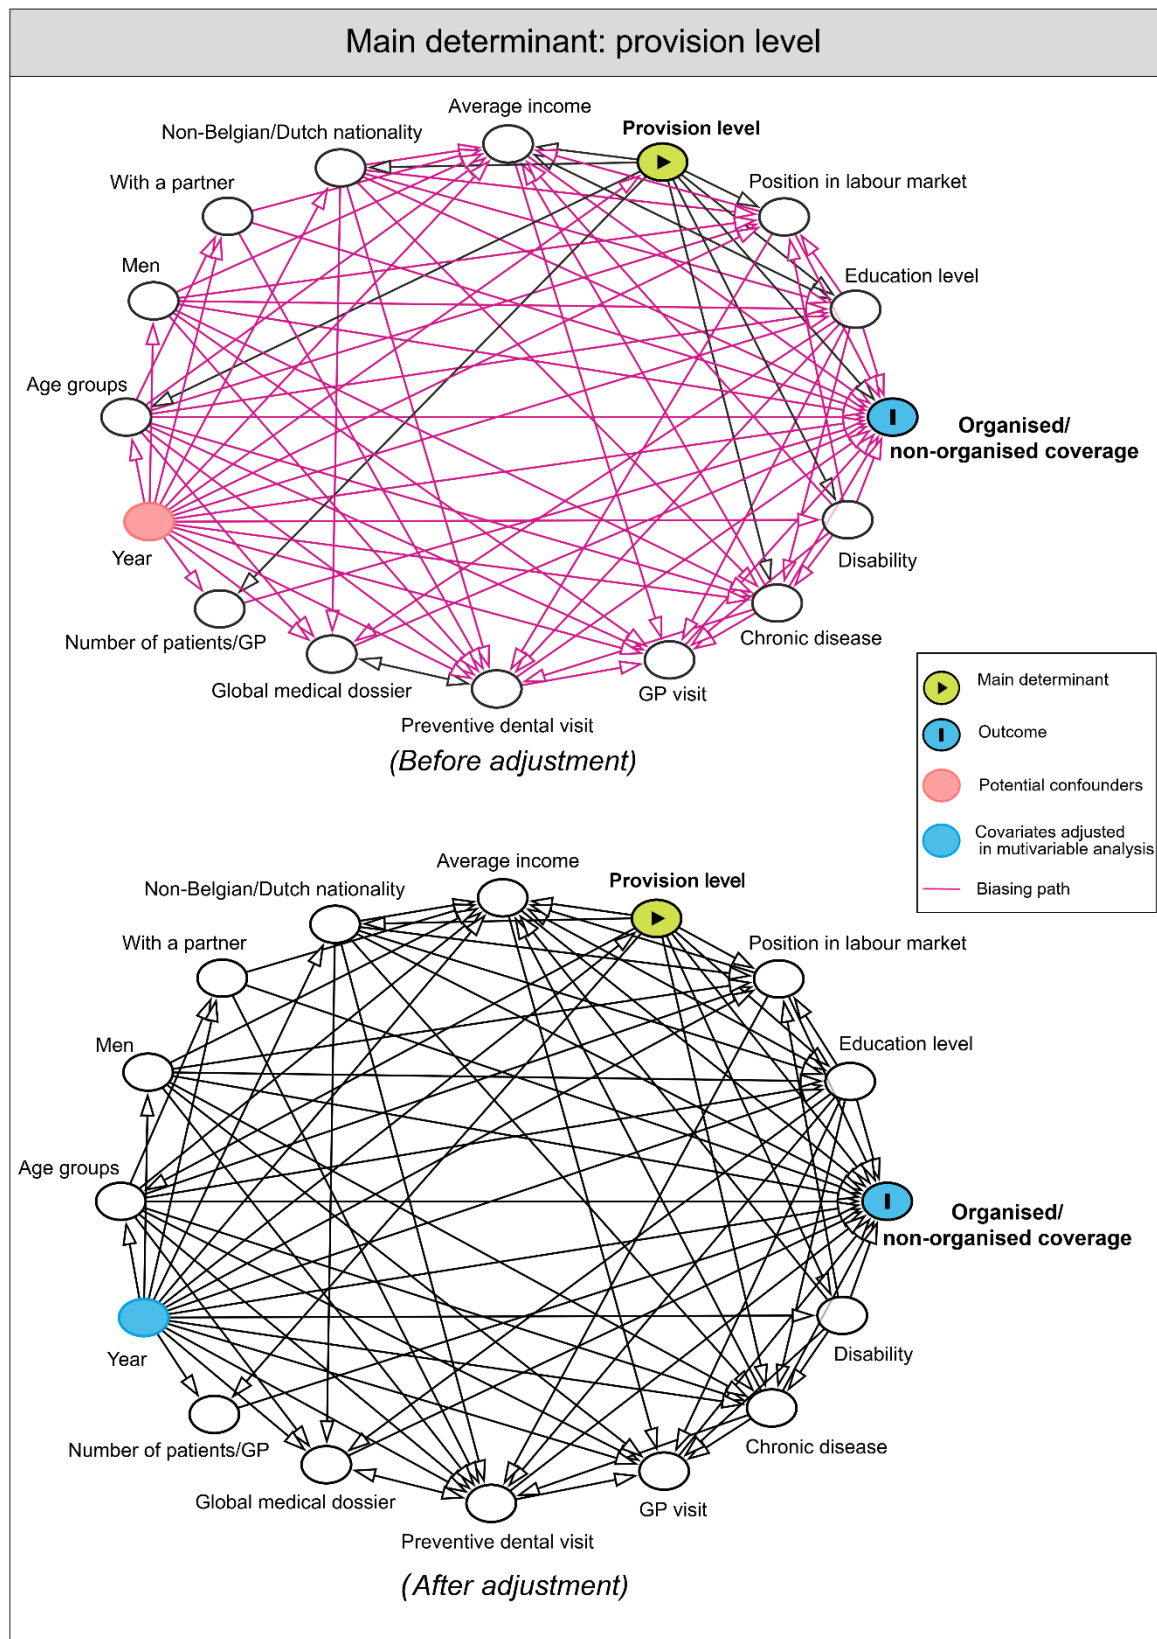

Supplementary Figure S1 Continued.

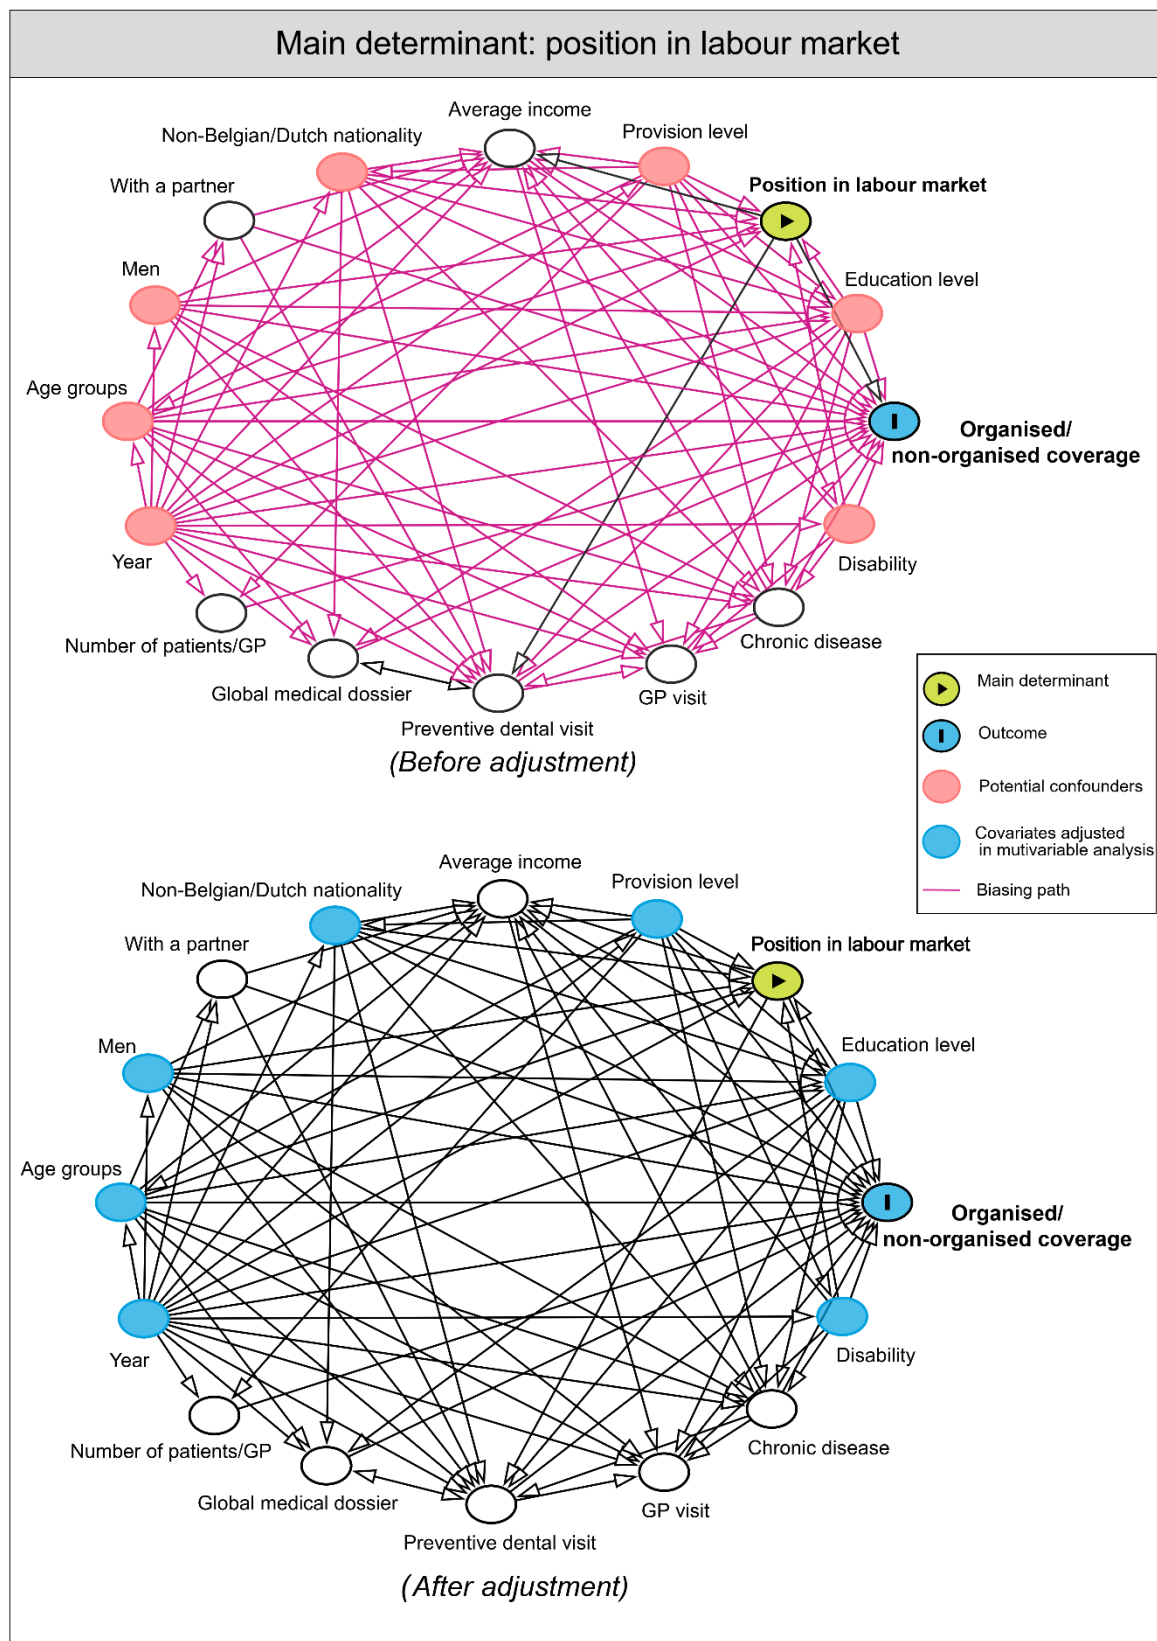



Supplementary Figure S1 Continued.

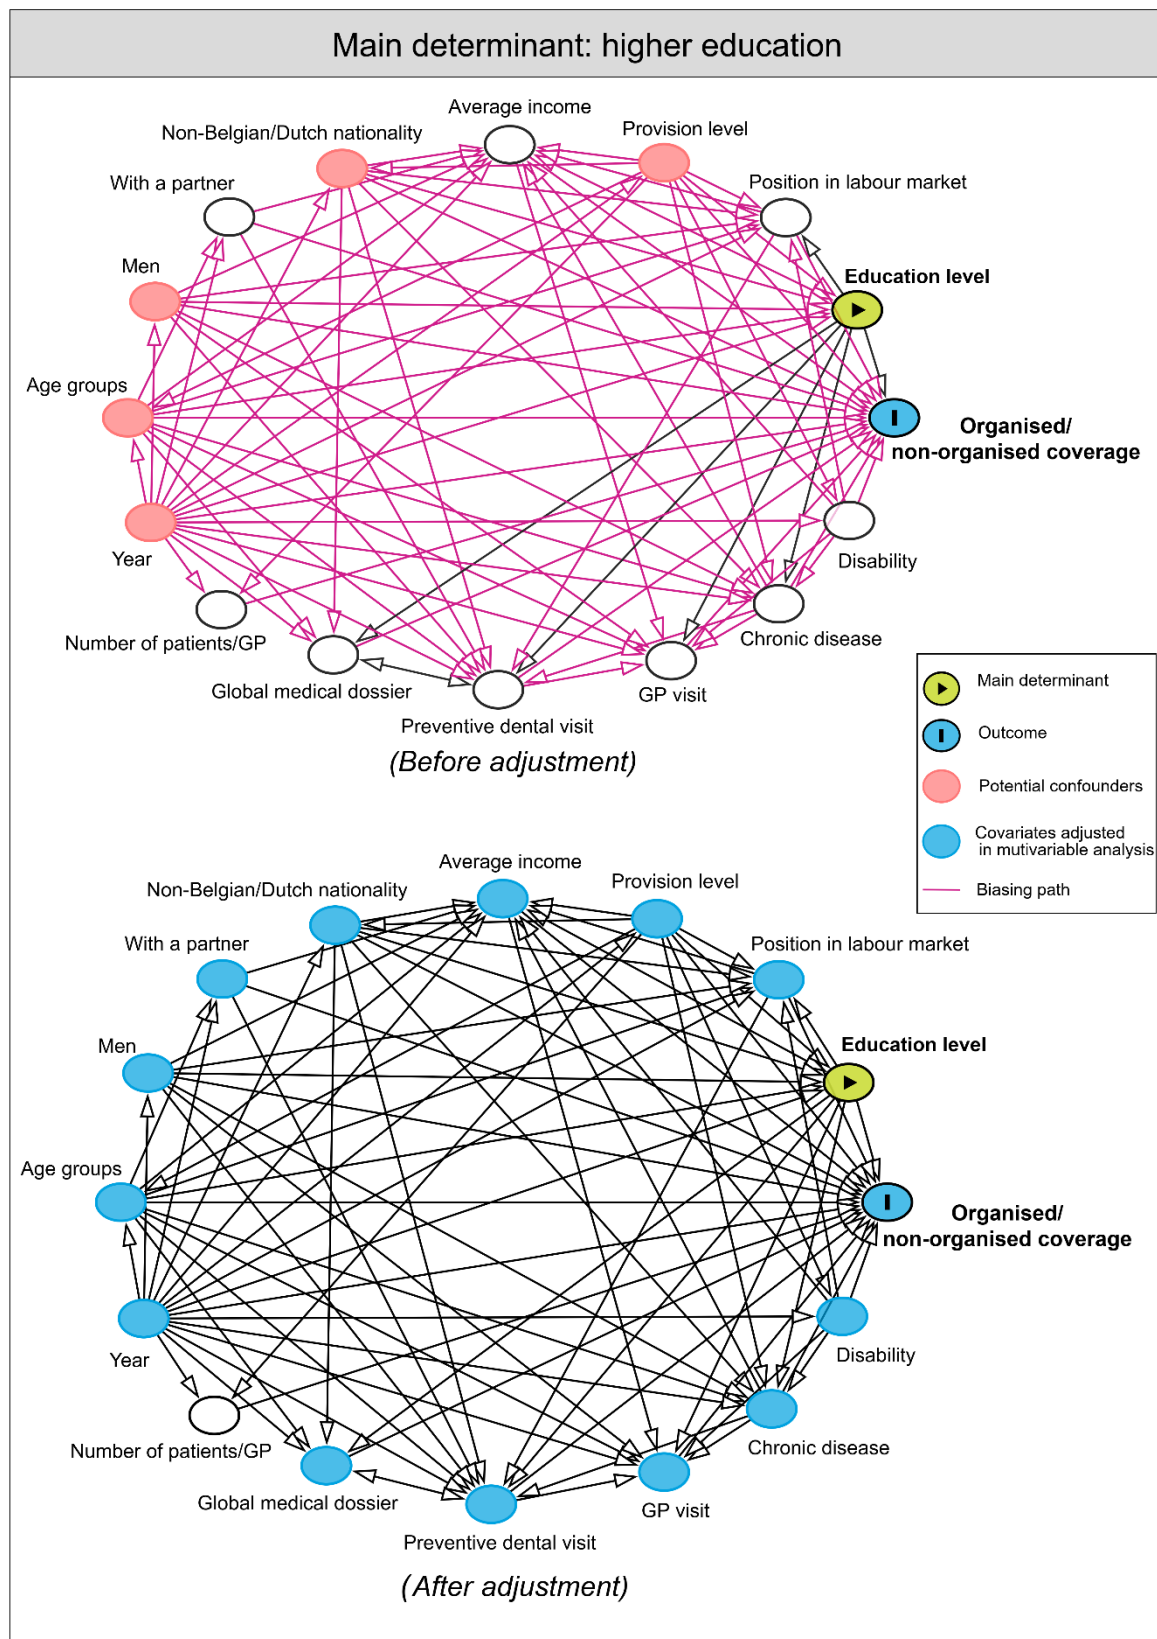

Supplementary Figure S1 Continued.

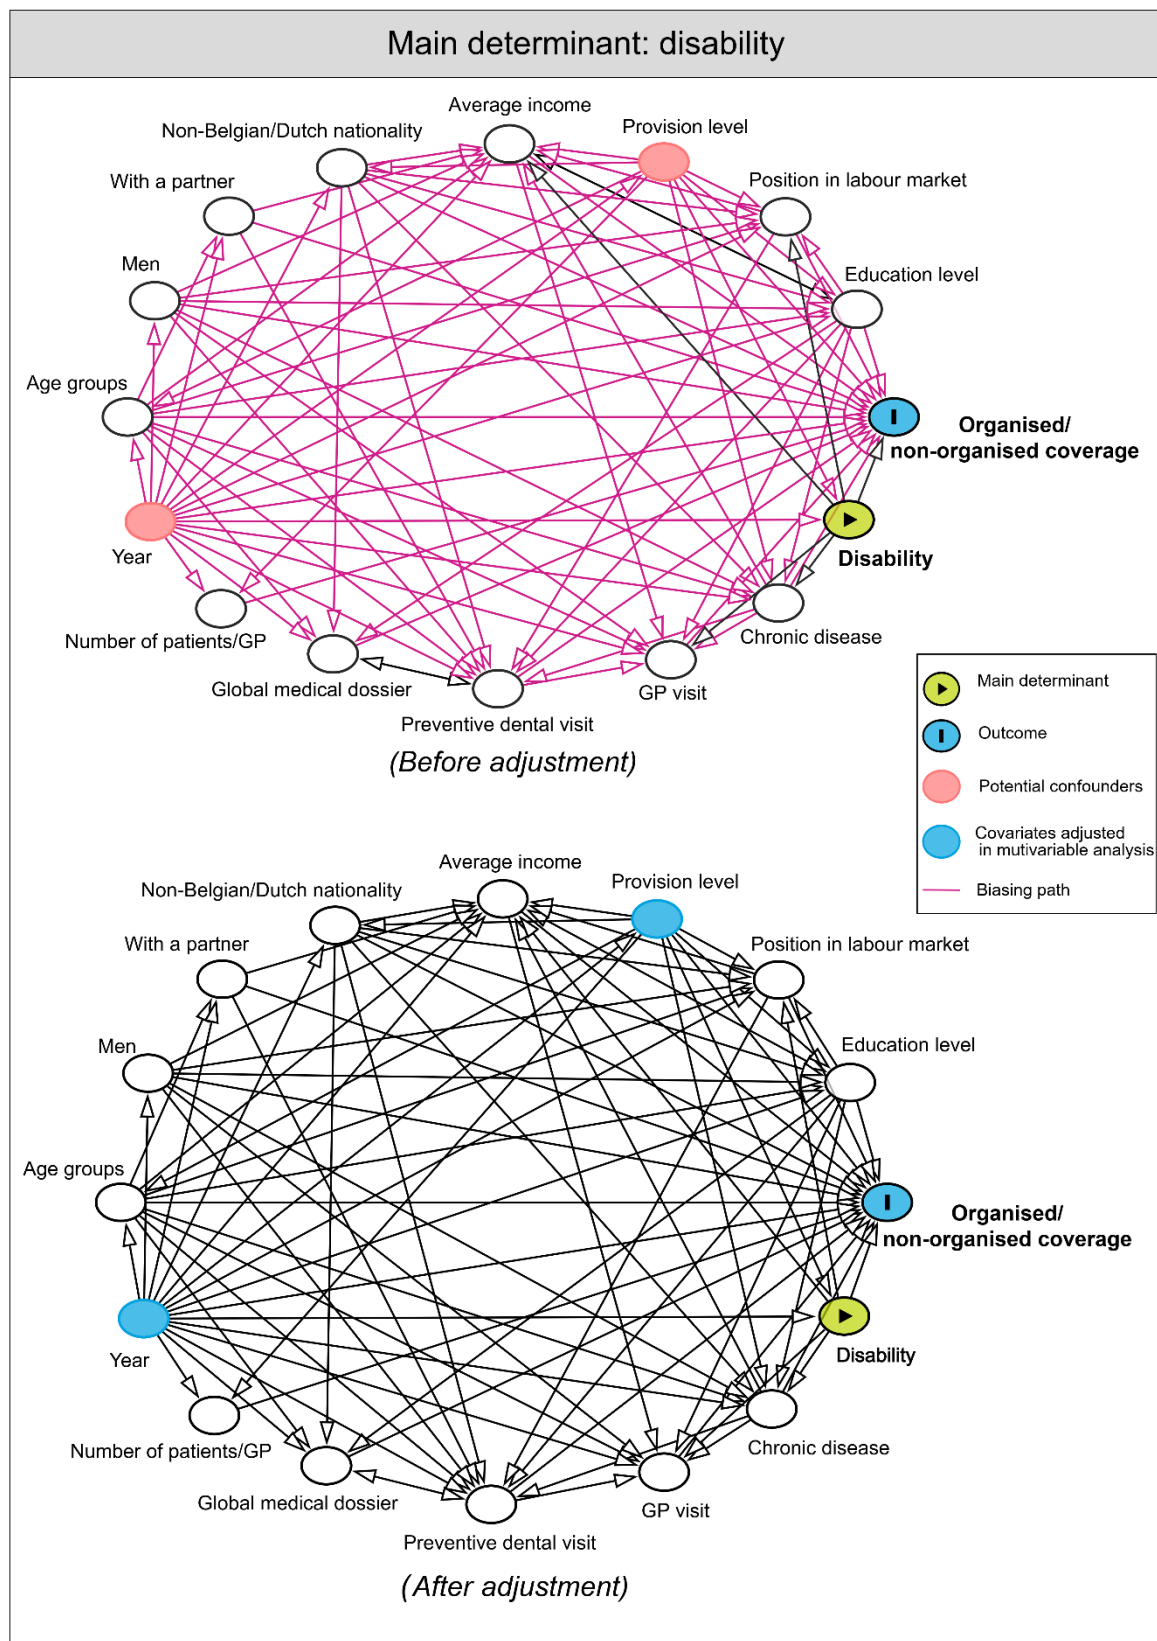

Supplementary Figure S1 Continued.

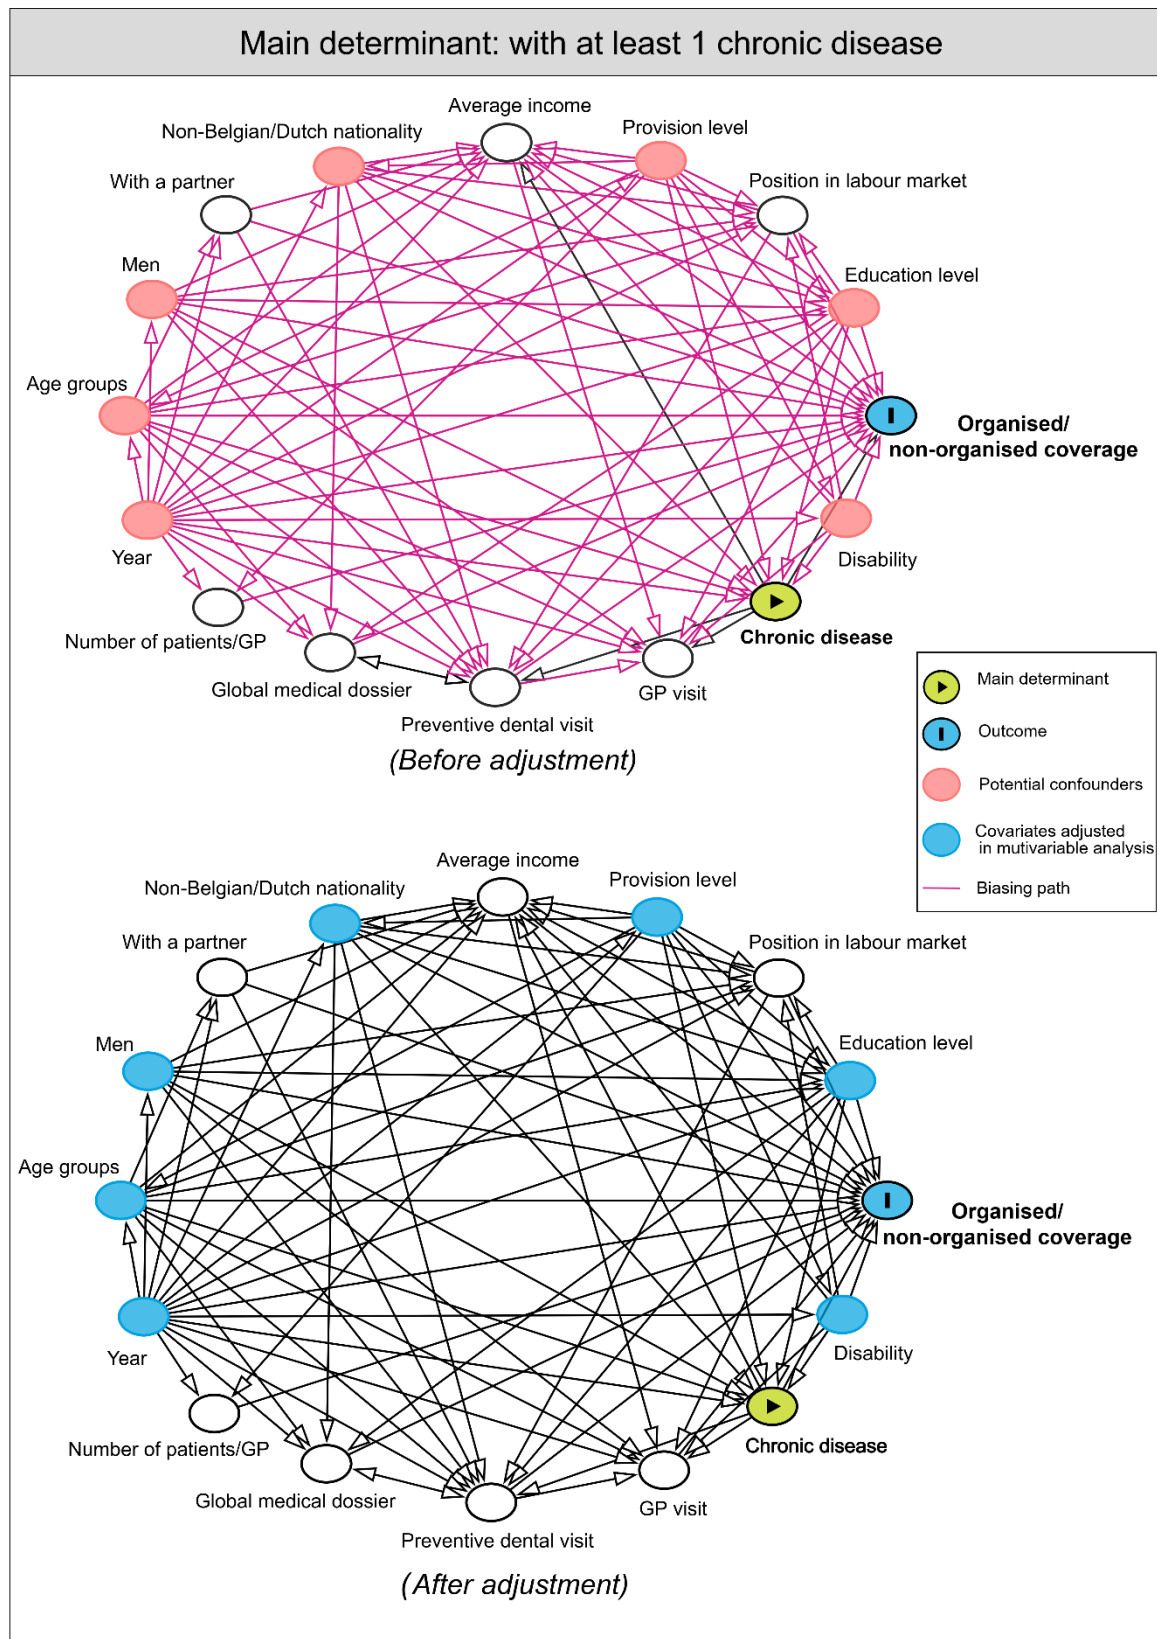

Supplementary Figure S1 Continued.

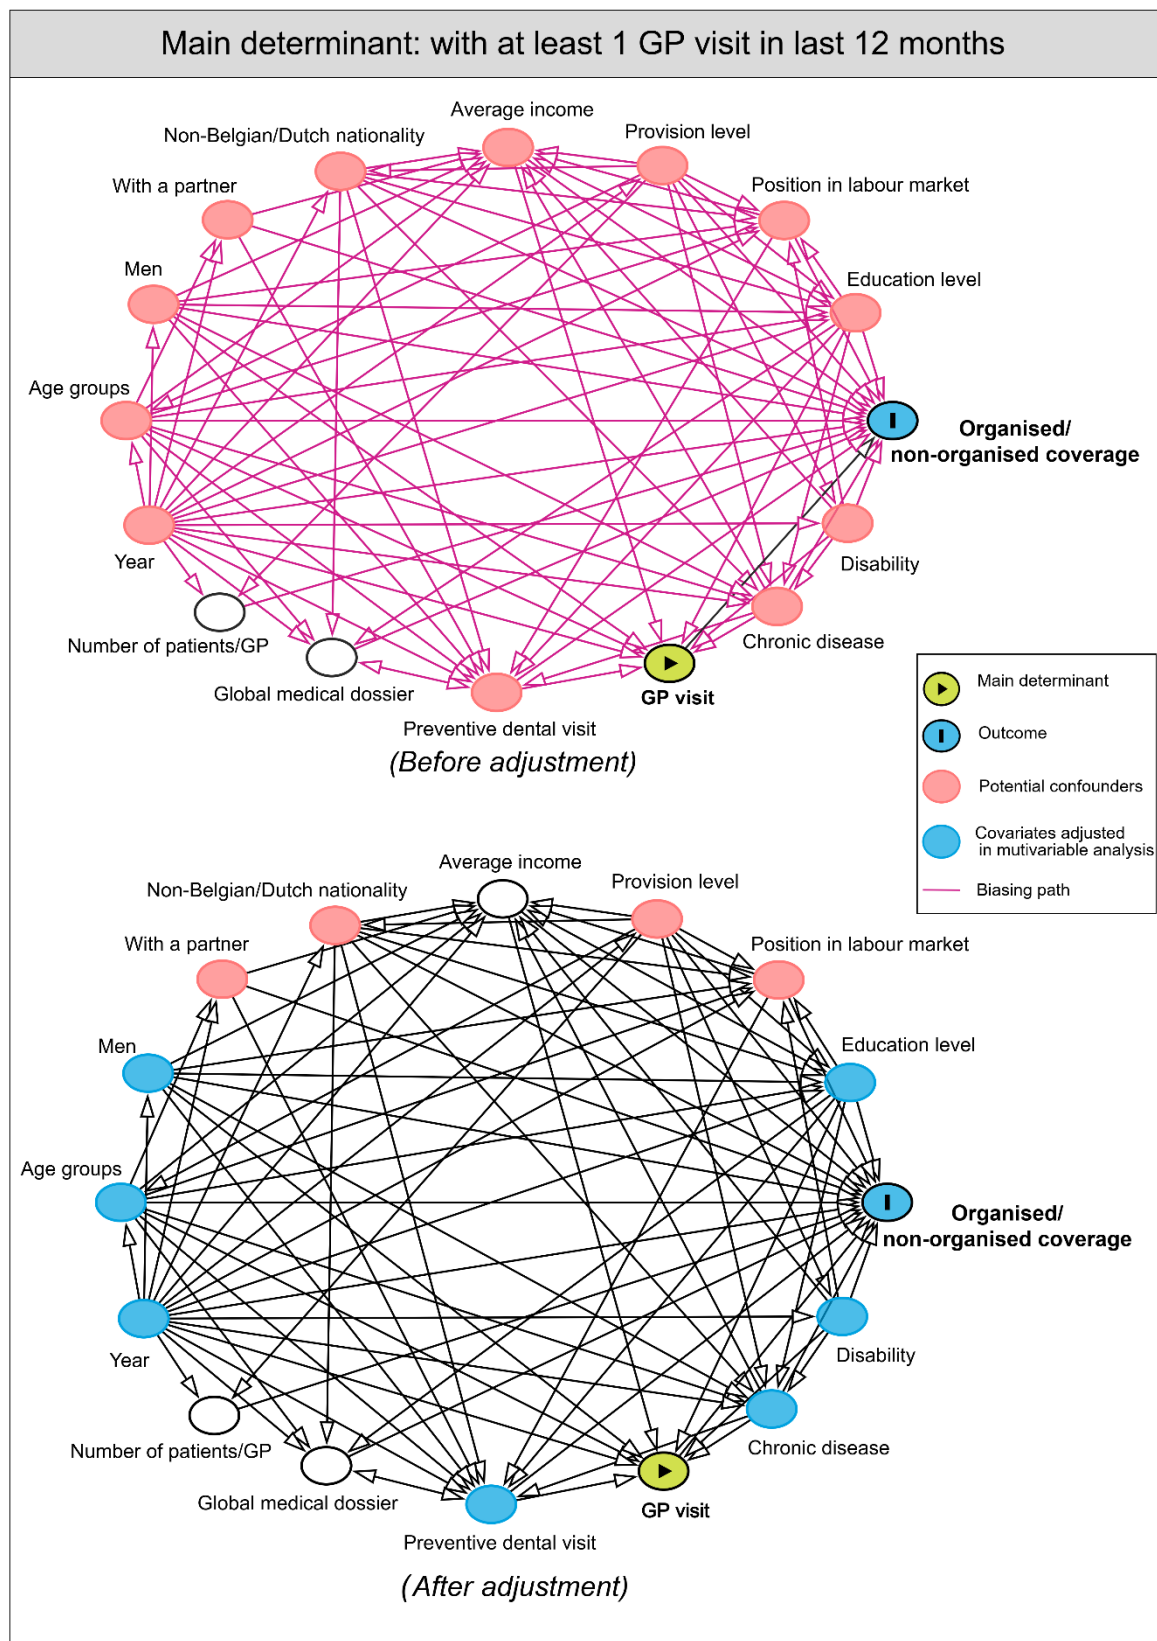



Supplementary Figure S1 Continued.

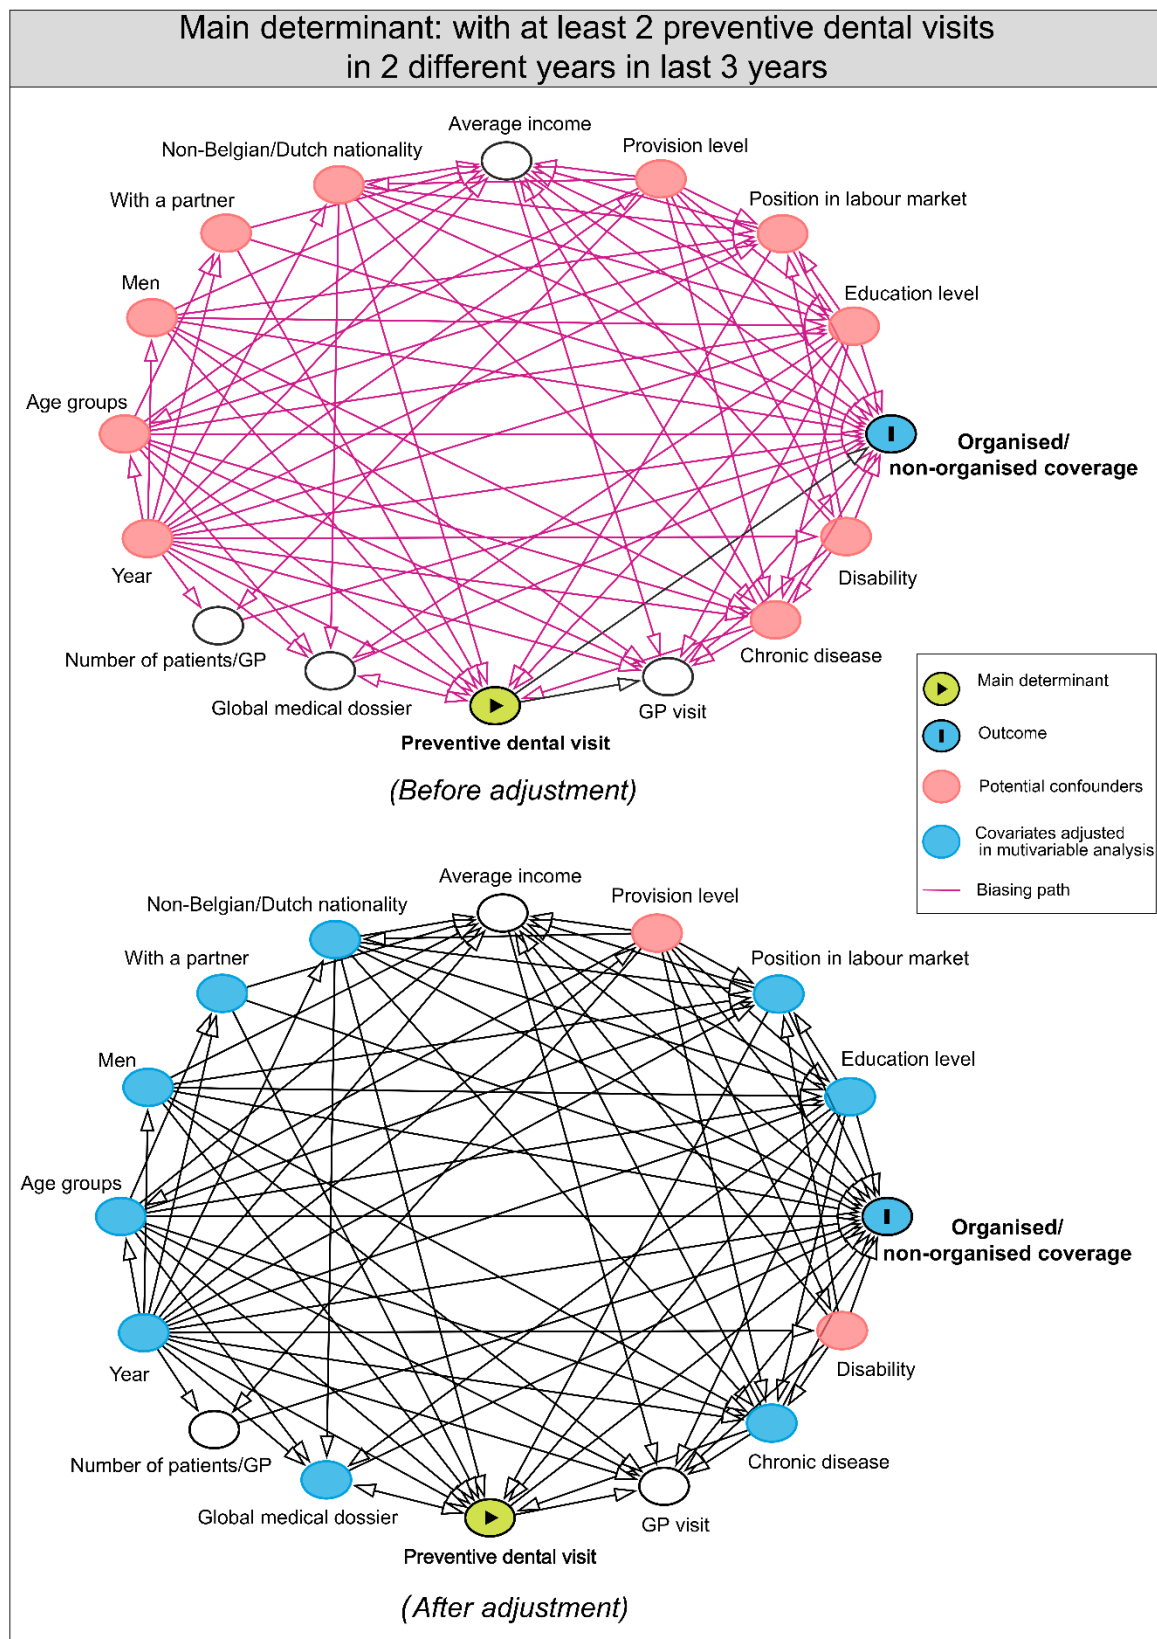

Supplementary Figure S1 Continued.

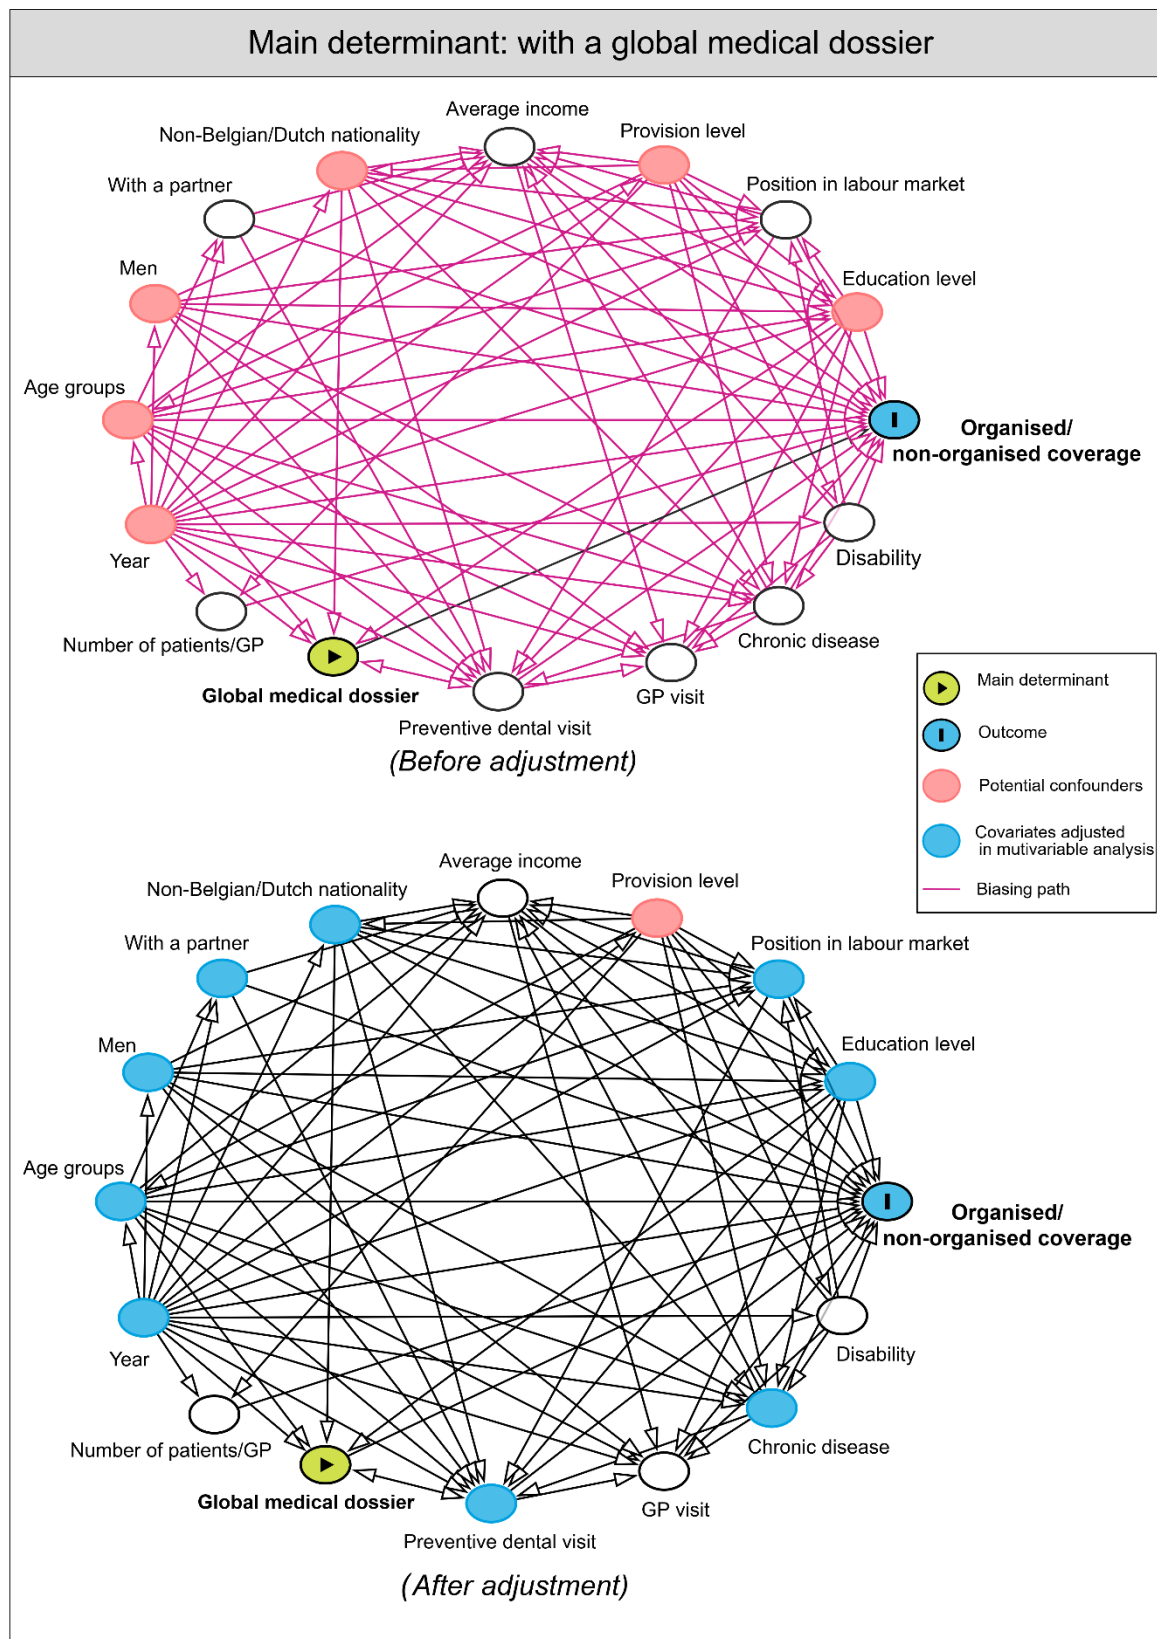

Supplementary Figure S1 Continued.

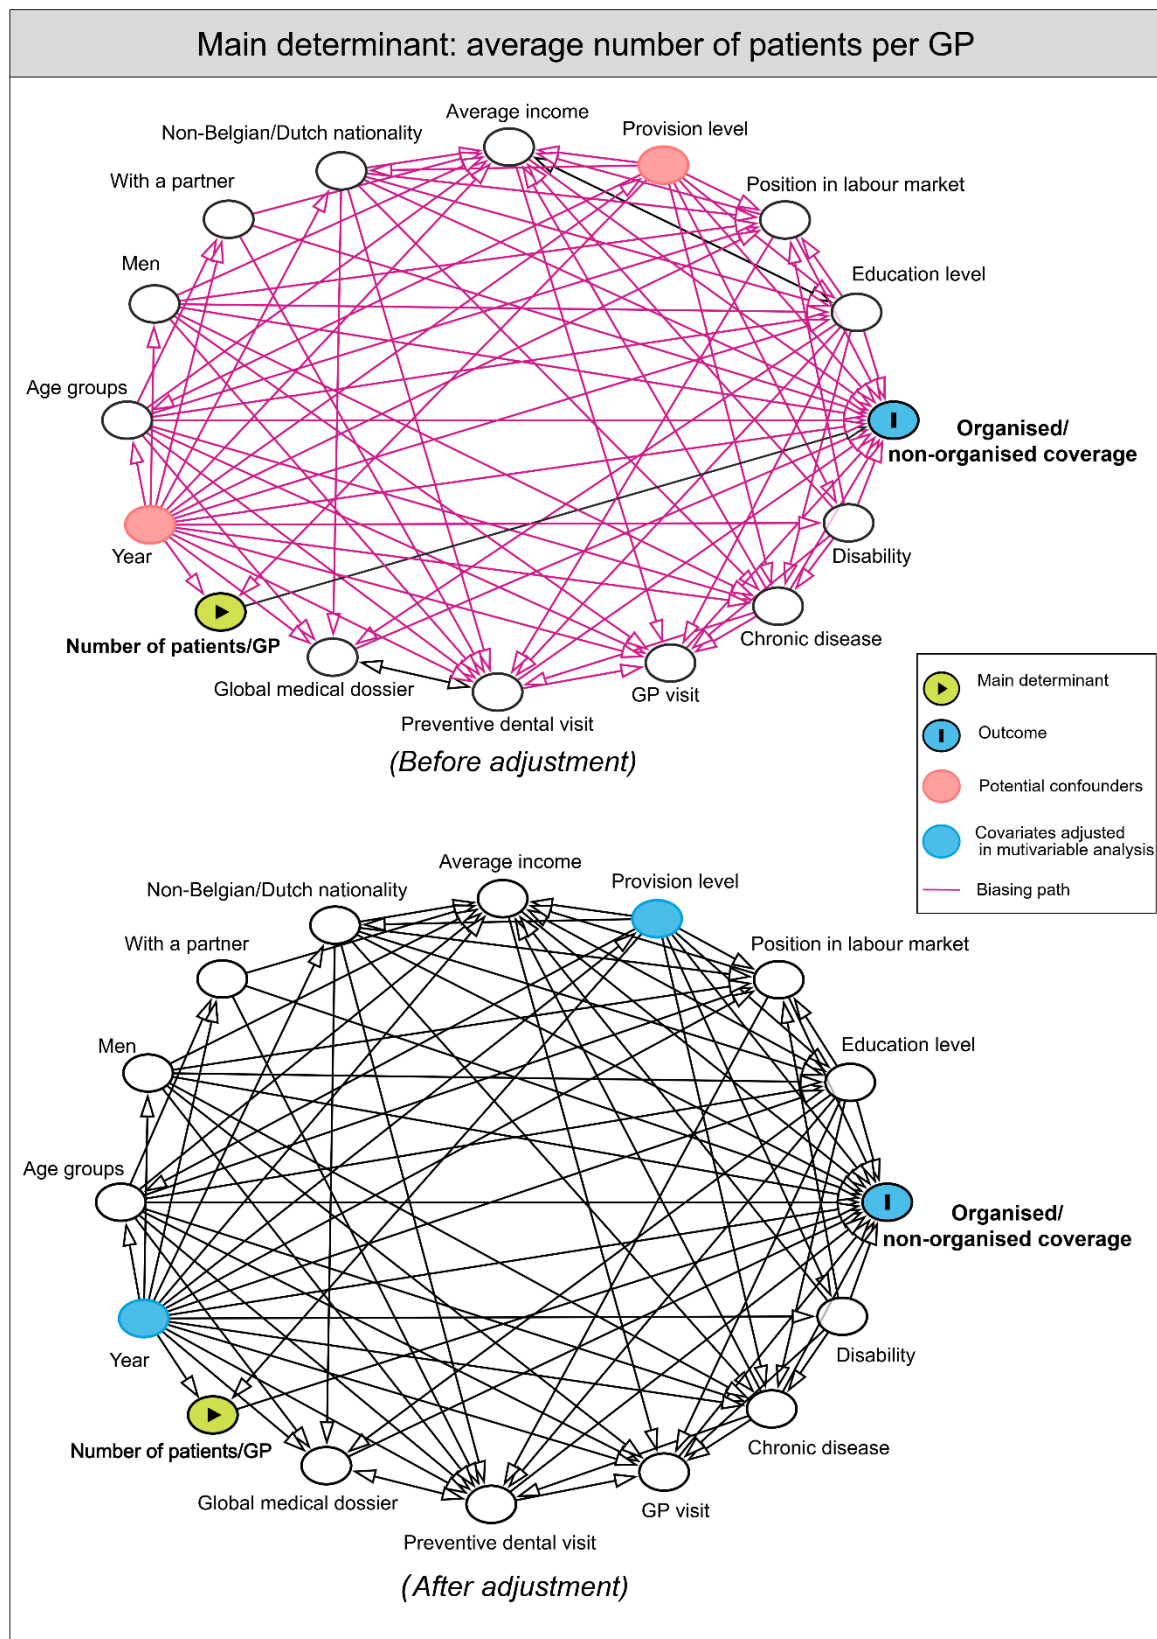

Supplement: s1 [file s1]
